# Supplementary material for: Glycosylation and functionality of recombinant β-glucocerebrosidase from various production systems
Source: PubMed Central journal article supplement (PMC3782720; doi:10.1042/bsr20130081), 2013-09-25
Supplement: bsr033e071add.pdf [file bsr033e071add.pdf]

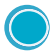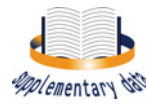

OPEN ACCESS

## SUPPLEMENTARY DATA

# Glycosylation and functionality of recombinant $\beta$ -glucocerebrosidase from various production systems

Yoram TEKOAH\*<sup>1</sup>, Salit TZABAN\*, Tali KIZHNER\*, Mariana HAINRICHSON\*, Anna GANTMAN\*, Myriam GOLEMBO\*, David AVIEZER\*† and Yoseph SHAALTIEL\*

\*Protalix Biotherapeutics, 2 Snunit Street, P.O. Box 455, Carmiel, 2161401, Israel, and †Faculty of Life Sciences, Bar Ilan University, Ramat Gan, 5290002, Israel

Supplementary Table S1 is on the following page

<sup>1</sup> To whom correspondence should be addressed (email yoram.tekoah@protalix.com).

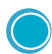**Table S1 Summary of relative area of peaks from NP-HPLC analysis and molecular mass detection of glycans released from taliglucerase alfa, imiglucerase and velaglucerase alfa**

Fc, core fucose; G, galactose; GU, glucose units; Man<sub>2</sub>–Man<sub>9</sub>, Man<sub>2-9</sub>GlcNAc<sub>2</sub>; ND = not detected; X, xylose. Numbers are percentage areas 2% and above limit of quantitation. Molecular mass of glycans is calculated as the monoisotopic mass + Na<sup>+</sup> adduct. Peak numbers are prefixed with T, Taliglucerase alfa, I, Imiglucerase alfa, V, Velaglucerase alfa. \*, non-assigned peak.

| GU value | Glycan acronym     | Mass calculated      | Taliglucerase alfa |               |        | Imiglucerase |               |        | Velaglucerase alfa |                      |        |
|----------|--------------------|----------------------|--------------------|---------------|--------|--------------|---------------|--------|--------------------|----------------------|--------|
|          |                    |                      | Peak               | Mass detected | % Area | Peak         | Mass detected | % Area | Peak               | Mass detected        | % Area |
| 4.40     | Man3               | 933.318              | T1                 | 933.577       | ND     | I1           | 933.940       | 5      |                    |                      |        |
| 4.62     | Fc(3)Man2X         | 1049.365             | T2                 | 1049.483      | 2      |              |               |        |                    |                      |        |
| 4.88     | Fc(6)Man3 A1       | 1079.375<br>1136.397 |                    |               |        | I2           | 1079.787 ND   | 61     |                    |                      |        |
| 4.93     | Man3X              | 1065.360             | T3                 | 1065.501      | 5      |              |               |        |                    |                      |        |
| 5.31     | Fc(3)Man3          | 1079.375             | T4                 | ND            | ND     |              |               |        |                    |                      |        |
| 5.36     | Fc(6)A1 A2         | 1282.455<br>1339.476 |                    |               |        | I3           | 1283.006 ND   | 14     |                    |                      |        |
| 5.84     | Fc(6)A2            | 1485.534             |                    |               |        | I4           | 1486.101      | 5      |                    |                      |        |
| 5.90     | Fc(3)Man3X         | 1211.418             | T5                 | 1211.565      | 93     |              |               |        |                    |                      |        |
| 6.16     | Man5               | 1257.423             | T6                 | ND            | ND     |              |               |        |                    |                      |        |
| 6.26     | Fc(6)A1G           | 1444.508             |                    |               |        | I5           | 1445.288      | 4      |                    |                      |        |
| 6.40     | Fc(3)A1X           | 1414.497             | T7                 | ND            | ND     |              |               |        |                    |                      |        |
| 7.09     | A2G2               | 1663.582             |                    |               |        | I6           | ND            | 5      |                    |                      |        |
| 7.10     | Man6               | 1419.476             | T8                 | ND            | ND     |              |               |        | V1                 | 1419.117             | 2      |
| 7.73     | Fc(6)A2G2          | 1809.640             |                    |               |        | I7           | ND            | 3      |                    |                      |        |
| 7.85     | Man7               | 1581.529             |                    |               |        |              |               |        | V2                 | 1581.114             | 5      |
| 7.90     | *                  |                      |                    |               |        | I8           | ND            | 3      |                    |                      |        |
| 8.00     | Man7               | 1581.529             | T9                 | ND            | ND     |              |               |        | V3                 | 1581.114             | 6      |
| 8.30     | *                  |                      |                    |               |        |              |               |        | V4                 | ND                   | ND     |
| 8.49     | *                  |                      |                    |               |        |              |               |        | V5                 | ND                   | ND     |
| 8.72     | FcMan7 (?)<br>Man8 | 1727.135<br>1743.581 |                    |               |        |              |               |        | V6                 | 1727.135<br>1743.124 | 7      |
| 8.75     | Man8               | 1743.581             |                    |               |        |              |               |        | V7                 | 1743.124             | 12     |
| 8.90     | Man8               | 1743.581             | T10                | ND            | ND     |              |               |        | V8                 | 1743.124             | 10     |
| 9.12     | *                  |                      |                    |               |        |              |               |        | V9                 | ND                   | 4      |
| 9.55     | Man9               | 1905.634             | T11                | ND            | ND     |              |               |        | V10                | 1905.140             | 51     |
| 10.16    | *                  |                      |                    |               |        |              |               |        | V11                | ND                   | ND     |
| 10.36    | *                  |                      |                    |               |        |              |               |        | V12                | ND                   | 4      |

Received 17 July 2013/6 August 2013; accepted 7 August 2013

Published as Immediate Publication 28 August 2013, doi 10.1042/BSR20130081
